# Supplementary material for: Simulations of cellulose translocation in the bacterial cellulose synthase suggest a regulatory mechanism for the dimeric structure of cellulose
Source: Royal Society of Chemistry journal article supplement (doi:10.1039/c5sc04558d), 2016-01-01
Supplement: c5sc04558d1.pdf [file c5sc04558d1.pdf]

## Supporting Information

# Simulations of cellulose translocation in the bacterial cellulose synthase suggest a regulatory mechanism for the dimeric structure of cellulose

Brandon C. Knott<sup>1</sup>, Michael F. Crowley<sup>2</sup>, Michael E. Himmel<sup>2</sup>, Jochen Zimmer<sup>3</sup>, Gregg T. Beckham<sup>\*1</sup>

<sup>1</sup>National Bioenergy Center, National Renewable Energy Laboratory, 15013 Denver West Parkway, Golden CO 80401, USA

<sup>2</sup>Biosciences Center, National Renewable Energy Laboratory, 15013 Denver West Parkway, Golden CO 80401, USA <sup>3</sup>Center for Membrane Biology, Department of Molecular Physiology and Biological Physics, University of Virginia, Charlottesville, VA 22980

### SIMULATION SETUP AND METHODOLOGY

All simulation systems were built and equilibrated in the molecular simulation package CHARMM.<sup>1</sup> Each system was built utilizing the CHARMM-GUI<sup>2</sup> Membrane Builder<sup>3-5</sup> online tool for constructing protein/membrane complexes for molecular dynamics (MD) simulations. The major components of *R. sphaeroides* membranes are phosphatidylcholine (PC), phosphatidylglycerol (PG), and phosphatidylethanolamine (PE);<sup>6,7</sup> past simulation work modeled this species' membrane as an equimolar mixture of POPE and POPG.<sup>8</sup> For simplicity, we chose an equimolar mixture of POPE and POPC for the lipid composition in all simulations, though the results we present are not likely to be influenced by the specific chemical nature of the lipid membrane. In all cases, the approximate size of the system was 95 x 95 x 190 Å<sup>3</sup> containing ~180,000 atoms. Ions were added to produce a 0.15 M NaCl solution; the exact number of ions was slightly adjusted to achieve an overall charge-neutral system. The CHARMM-GUI<sup>2</sup> also solvates the system with TIP3P water molecules. In all simulations, the protein, lipids, and nucleotide base (UDP) were described by the CHARMM36 with CMAP correction force field,<sup>9-12</sup> the carbohydrates by the CHARMM C35 force field,<sup>13-15</sup> and water was described with the TIP3P model.<sup>16,17</sup>

After each system was built, the CHARMM-GUI<sup>2</sup> minimization/relaxation protocol was followed. This consists of several rounds of minimization followed by 375 ps of MD with varying levels of harmonic restraints on different parts of the system. More specifically, a modified version of the CHARMM-GUI equilibration scheme was employed, in which six cycles of equilibration were performed, gradually reducing the force constants of restraints placed on various parts of the system. Cycle 1 also includes five rounds of minimization; each round of minimization includes 250 steps each of steepest descent (SD) and Adopted Basis Newton-Raphson (ABNR) minimization before MD commences. Table S1 details the timestep, number of steps, and various restraining forces on the system during minimization and equilibration.

**Table S1. Simulation details for minimization and equilibration, based on CHARMM-GUI protocol.**

|                    | cycle 1 | cycle 2 | cycle 3 | cycle 4 | cycle 5 | cycle 6 |
|--------------------|---------|---------|---------|---------|---------|---------|
| Timestep (fs)      | 1       | 1       | 1       | 2       | 2       | 2       |
| Number of steps    | 25,000  | 25,000  | 25,000  | 50,000  | 50,000  | 50,000  |
| FORCES (kcal/mol)  |         |         |         |         |         |         |
| Backbone           | 10.0    | 10.0    | 2.5     | 1.0     | 0.5     | 0.0     |
| Sidechain          | 5.0     | 5.0     | 1.0     | 0.0     | 0.0     | 0.0     |
| Ligand             | 10.0    | 10.0    | 1.0     | 0.0     | 0.0     | 0.0     |
| Force (Water)      | 2.5     | 2.5     | 1.0     | 0.5     | 0.1     | 0.0     |
| Force (Lipid tail) | 2.5     | 2.5     | 1.0     | 0.5     | 0.1     | 0.0     |
| Force (Lipid head) | 2.5     | 2.5     | 1.0     | 0.5     | 0.1     | 0.0     |

*Force (Water)* is the force constant on water molecules to keep them from entering the hydrophobic core of the lipid bilayer during minimization and equilibration, *Force (Lipid tail)* is the force constant to keep the lipid tail away from the hydrophobic core during equilibration, and *Force (Lipid head)* is the force constant to keep the lipid head groups close to their target values. Note that all of these restraints are 'turned off' for the last round of equilibration as well as all subsequent production runs.

The following parameters were utilized for the MD simulations utilizing the NAMD<sup>18</sup> simulation package: periodic boundary conditions, 2 fs timestep, CHARMM forcefield as described above, 12 Å nonbonded interaction cutoff, SHAKE<sup>19,20</sup>-constrained hydrogen bonds, 12 Å nonbonded interaction cutoff, and temperature of 300 K. The ensemble simulated is the Np<sub>z</sub>Y<sub>xy</sub>T ensemble; this involves a constant number of atoms, constant pressure in the z dimension (normal to the lipid bilayer surface), constant surface tension in the plane of the bilayer, and constant temperature. The normal pressure (p<sub>z</sub>) is set to 1 bar (controlled by the Langevin piston Nose-Hoover method), and the surface

tension in the xy plane ( $\Upsilon_{xy}$ ) is set to 0.0 dynes/cm. The three orthogonal box dimensions of the periodic cell are allowed to fluctuate independently. Long range electrostatics beyond the real-space nonbonded interaction cutoff are computed using particle mesh Ewald<sup>21-23</sup> summation with a 6<sup>th</sup> order B-spline interpolation and a grid size of 96x96x180.

The CHAMBER<sup>24</sup> program was used to convert the CHARMM protein structure file, coordinate file, and associated force field files to an AMBER topology file and coordinate file. The Sander program of the AMBER<sup>25</sup> software package (version 12) was used to perform the umbrella sampling (US) simulations. Amber12's<sup>25</sup> 'targeted MD' utility enables US along RMSD-based coordinates. The starting configurations for each of the US windows was produced by pulling the cellulose chain 'backwards' (from the 'up' state, i.e. post-translocation state) toward the active site targeting various RMSD values to the appropriate reference structure. This was done in approximately thirty increments of 0.25 Å in magnitude. Each increment was run for 10 ps. The final configuration from each of these increments is the starting point for an US simulation in that window.

The 'opposite side' configuration (as in cellulose, see main text Figure 3b) was constructed with the protein configuration and the cellulose chain from the crystal structure with cyclic-di-GMP and UDP bound (PDB code 4P00).<sup>26</sup> The basis for the protein configuration in the 'same side' configuration (see main text Figure 3e) was the crystal structure with cyclic-di-GMP and UDP bound (PDB code 4P00).<sup>26</sup> The cellulose configuration originated from the crystal structure with the cellulose chain in the 'down' state, pre-translocation (PDB code 4HG6).<sup>27</sup> The two glucose rings closest to the active site were deleted, and then a single glucose ring was added in their place in the same configuration as the penultimate glucose. The system was then equilibrated for 400 ps of unrestrained MD.

For the opposite side scenario, the *reference structure* for the cellulose chain comes from the crystal structure with an elongated cellulose chain and lacking cyclic di-GMP (PDB code 4HG6).<sup>27</sup> For the same side scenario, the *reference structure* comes from crystal structure with cyclic di-GMP and UDP bound (PDB code 4P00).<sup>26</sup> The RMSD coordinate utilized is the C1 and C4 atoms of the glucose rings within the transmembrane region. In each case, this comprises 14 total carbon atoms that are restrained in the US simulations. Note that in each case, the restrained atoms are all in the transmembrane region; thus all atoms in the cellulose chain that are near the active site are unrestrained. The tMD force constant is 70 kcal/mol/Å<sup>2</sup>. Approximately 36 US windows were utilized for each scenario, spaced 0.25 Å apart. Potentials of mean force (PMF) were constructed by the weighted histogram analysis method (WHAM)<sup>28</sup> (code from Alan Grossfield<sup>29</sup>) from the last 3 ns of 30 total ns of US. As with the unrestrained MD simulations, the US is performed in the  $Np_z \Upsilon_{xy} T$  ensemble with  $p_z$  set to 1 bar,  $\Upsilon_{xy}$  set to 0.0 dynes/cm, and thermostat temperature of 300 K.



# BCS SEQUENCE ALIGNMENT

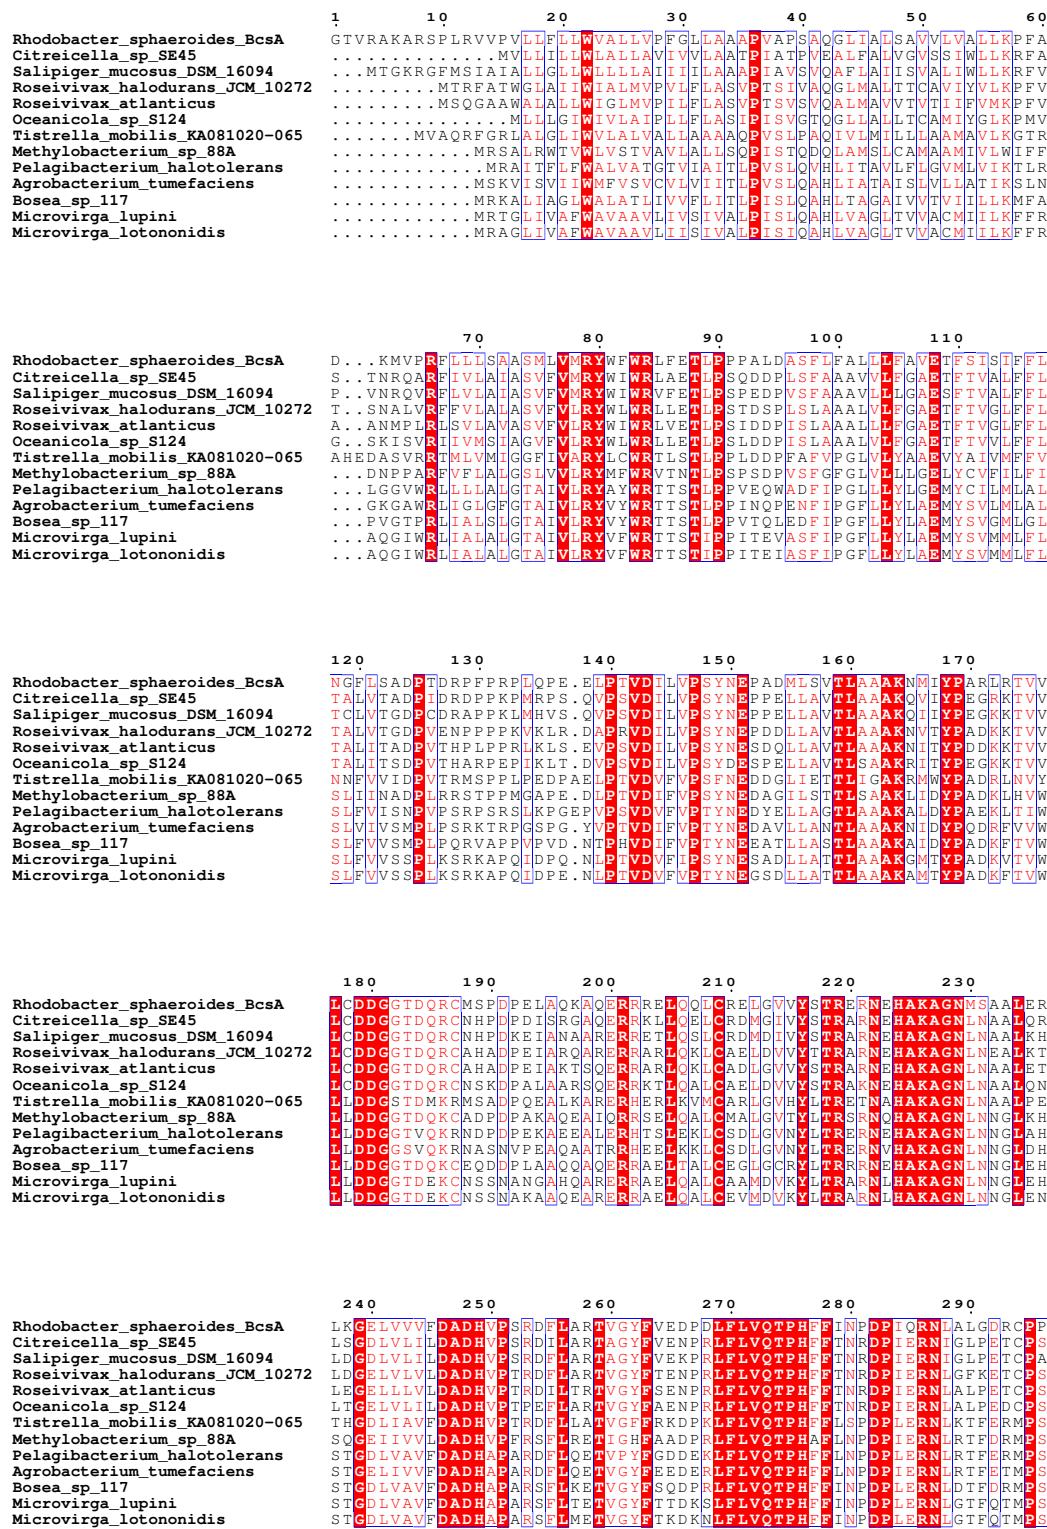

Figure S1. Sequence alignment of the bacterial cellulose synthase with the twelve closest non-redundant BLAST hits. All are from bacteria. Strictly conserved residues are shown in red block, and chemically similar residues in red text. The blue boxes indicate chemical similarity across a grouping of residues. The figure was generated with ESPrnt (<http://esprnt.ibcp.fr>).<sup>34</sup> (The sequence alignment continues on the next two pages.)

300 310 320 330 340 350

Rhodobacter\_sphaeroides\_BcsA  
 Citreicella\_sp\_SE45  
 Salipiger\_mucosus\_DSM\_16094  
 Roseivivax\_halodurans\_JCM\_10272  
 Roseivivax\_atlanticus  
 Oceanicola\_sp\_S124  
 Tistrella\_mobilis\_KA081020-065  
 Methylobacterium\_sp\_88A  
 Pelagibacterium\_halotolerans  
 Agrobacterium\_tumefaciens  
 Bosea\_sp\_117  
 Microvirga\_lupini  
 Microvirga\_lotononidis

360 370 380 390 400 410

Rhodobacter\_sphaeroides\_BcsA  
 Citreicella\_sp\_SE45  
 Salipiger\_mucosus\_DSM\_16094  
 Roseivivax\_halodurans\_JCM\_10272  
 Roseivivax\_atlanticus  
 Oceanicola\_sp\_S124  
 Tistrella\_mobilis\_KA081020-065  
 Methylobacterium\_sp\_88A  
 Pelagibacterium\_halotolerans  
 Agrobacterium\_tumefaciens  
 Bosea\_sp\_117  
 Microvirga\_lupini  
 Microvirga\_lotononidis

420 430 440 450 460 470

Rhodobacter\_sphaeroides\_BcsA  
 Citreicella\_sp\_SE45  
 Salipiger\_mucosus\_DSM\_16094  
 Roseivivax\_halodurans\_JCM\_10272  
 Roseivivax\_atlanticus  
 Oceanicola\_sp\_S124  
 Tistrella\_mobilis\_KA081020-065  
 Methylobacterium\_sp\_88A  
 Pelagibacterium\_halotolerans  
 Agrobacterium\_tumefaciens  
 Bosea\_sp\_117  
 Microvirga\_lupini  
 Microvirga\_lotononidis

480 490 500 510 520 530

Rhodobacter\_sphaeroides\_BcsA  
 Citreicella\_sp\_SE45  
 Salipiger\_mucosus\_DSM\_16094  
 Roseivivax\_halodurans\_JCM\_10272  
 Roseivivax\_atlanticus  
 Oceanicola\_sp\_S124  
 Tistrella\_mobilis\_KA081020-065  
 Methylobacterium\_sp\_88A  
 Pelagibacterium\_halotolerans  
 Agrobacterium\_tumefaciens  
 Bosea\_sp\_117  
 Microvirga\_lupini  
 Microvirga\_lotononidis

540 550 560 570 580 590

Rhodobacter\_sphaeroides\_BcsA  
 Citreicella\_sp\_SE45  
 Salipiger\_mucosus\_DSM\_16094  
 Roseivivax\_halodurans\_JCM\_10272  
 Roseivivax\_atlanticus  
 Oceanicola\_sp\_S124  
 Tistrella\_mobilis\_KA081020-065  
 Methylobacterium\_sp\_88A  
 Pelagibacterium\_halotolerans  
 Agrobacterium\_tumefaciens  
 Bosea\_sp\_117  
 Microvirga\_lupini  
 Microvirga\_lotononidis

|                                 |                  |        |       |       |                                |
|---------------------------------|------------------|--------|-------|-------|--------------------------------|
|                                 | 600              | 610    | 620   | 630   | 640                            |
| Rhodobacter_sphaeroides_BcsA    | AFGNRSL.....TAV  | WLDAS  | TSGVR | LRLL  | ...PGVGDHPFALEAGGLTQ...FCP     |
| Citricella_sp_SE45              | SKTDGAGVS.....AV | LRMS   | SGRTO | QFTL  | NDDE..ARE.ELGMIRSGDRLV...LCP   |
| Salipiger_mucosus_DSM_16094     | GQHSQSATD.....VV | LRAS   | ARKM  | RFVFA | DDDR..KNE...MIGEARLV...IRP     |
| Roseivivax_halodurans_JCM_10272 | GADDDAA.....DLE  | TTISA  | SPTV  | QARL  | LAAGALPKGLAPG.SEGAAPMRGK...LSP |
| Roseivivax_atlanticus           | GDETTGAGA...TMD  | VTTIA  | ATAGS | VQLR  | LDPSGSDSATRDWKKLSIKGALAT...LTP |
| Oceanicola_sp_S124              | PAESDQSPAPSGEPRE | ATILS  | ASPER | IQQL  | LT...ESGQESWTPEQ.VGAEV...LLP   |
| Tistrella_mobilis_KA081020-065  | G.....TLYE       | GALLD  | LSQGG | ARLA  | TPARQAPKGRLAG...RFAELLVDELTA   |
| Methylobacterium_sp_88A         | G.....RALD       | VATER  | ASALG | CTIR  | FGEAGLPP...GA...GSTHRMGQLSV    |
| Pelagibacterium_halotolerans    | D.G.....TWVR     | GTILN  | VS    | SGGVA | IQVADG.KTRLAKDQ...ATAIRFQTLSE  |
| Agrobacterium_tumefaciens       | DND.....AWMP     | ATTIEN | VS    | VNGML | IHFEEGLSVVEKGS...KAVIRVKPHESE  |
| Bosea_sp_117                    | D.....VAYP       | ATIED  | VS    | IGGAG | IRTAAGNLPKIDRGO...IASIRFKPQSD  |
| Microvirga_lupini               | D.....EIID       | AVLKD  | VS    | VGGAR | VHVPPSAEPKLLKGA...SGTLLEQPFSS  |
| Microvirga_lotononidis          | D.....EATD       | AVVRD  | VS    | VGGAR | VHVPPSAEPKLLKGA...AGTLLEQPFSSN |

|                                 |              |         |         |         |                                 |
|---------------------------------|--------------|---------|---------|---------|---------------------------------|
|                                 | 650          | 660     | 670     | 680     | 690                             |
| Rhodobacter_sphaeroides_BcsA    | KFPDAPQLERMV | VRGR..T | RSARRE  | GGTV    | MVGVIFEAGQPIAVRETVAYLIFGESAHWRT |
| Citricella_sp_SE45              | VIPAAPDLEHHL | LRH     | LVTRV   | SHDE    | QAGRGTA                         |
| Salipiger_mucosus_DSM_16094     | KIDDPALQHE   | LTIT    | LTRA    | EDPS    | DNAGRRL                         |
| Roseivivax_halodurans_JCM_10272 | VLPKSPALQTP  | LNVT    | VNEV    | RSDP..  | DGLLEL                          |
| Roseivivax_atlanticus           | ILEKTPQLEAP  | LEV     | SISV    | VSSGA.. | DGIRV                           |
| Oceanicola_sp_S124              | IILPKAADLEVP | LTIT    | LAGV    | RPGV..  | EGTRV                           |
| Tistrella_mobilis_KA081020-065  | PAHLATGEARF  | VP      | EMRYG.. | RPDD    | DAGNIO                          |
| Methylobacterium_sp_88A         | VPIDGAPVQVP  | LP      | VEIGE   | LT..    | TQSGDEVV                        |
| Pelagibacterium_halotolerans    | VPDN.....EMG | FV      | RRNV..  | SNAG    | KSSM                            |
| Agrobacterium_tumefaciens       | GVPE.....T   | MPN     | IVRS..  | VRQ     | GYTS                            |
| Bosea_sp_117                    | IGID.....T   | LP      | AI      | RRNV..  | KREG                            |
| Microvirga_lupini               | LPVQ.....H   | LP      | ME      | IRKV..  | GMDD                            |
| Microvirga_lotononidis          | LPIQ.....H   | LP      | ME      | IRKV..  | GMDD                            |

|                                 |             |     |      |      |     |      |
|---------------------------------|-------------|-----|------|------|-----|------|
|                                 | 700         | 710 | 720  | 730  | 740 | 750  |
| Rhodobacter_sphaeroides_BcsA    | MREATMRPIGL | THM | ARIT | WMA  | ASL | PKT  |
| Citricella_sp_SE45              | AREALPQARGL | IS  | CVFV | LRLS | VGS | IVP  |
| Salipiger_mucosus_DSM_16094     | AREAVPRSRGL | IS  | CVFV | LRLS | TSI | VPS  |
| Roseivivax_halodurans_JCM_10272 | FRKVVPRSS   | LV  | AGL  | AVYV | L   | GKAA |
| Roseivivax_atlanticus           | FRKVRPQSS   | LL  | AGL  | LVYV | L   | AKS  |
| Oceanicola_sp_S124              | FRKFHAQGS   | LV  | TCL  | LYV  | L   | AKS  |
| Tistrella_mobilis_KA081020-065  | LLSRRRHRP   | GV  | VR   | VAHF | I   | RLS  |
| Methylobacterium_sp_88A         | FQSSRRRHKN  | LL  | SL   | TI   | QLI | W    |
| Pelagibacterium_halotolerans    | RQESRQVNI   | GI  | IL   | CTI  | Q   | L    |
| Agrobacterium_tumefaciens       | LQSSRRKNP   | G   | L    | IK   | CT  | A    |
| Bosea_sp_117                    | FQYSSRRHNP  | G   | V    | L    | KT  | Q    |
| Microvirga_lupini               | FQKNRHHDI   | G   | V    | L    | R   | CT   |
| Microvirga_lotononidis          | FQKNRHHDI   | G   | V    | L    | R   | CT   |

|                                 |               |       |       |        |
|---------------------------------|---------------|-------|-------|--------|
|                                 | 760           | 770   | 780   | 790    |
| Rhodobacter_sphaeroides_BcsA    | .....DF.....  | STEPD | WAGEL | LDPTA  |
| Citricella_sp_SE45              | KTAIEHYLADR   | ..... | GALPA | PATE   |
| Salipiger_mucosus_DSM_16094     | TEAIIKYYLADN  | ..... | TSDD  | SLSA   |
| Roseivivax_halodurans_JCM_10272 | KARTKPA.....  | GRADL | DDDG  | YLTVEE |
| Roseivivax_atlanticus           | EQ.EKPAEPV    | ..... | QRRRS | AESQ   |
| Oceanicola_sp_S124              | .....         | ..... | ..... | .....  |
| Tistrella_mobilis_KA081020-065  | ...TEPASAQ... | EGV   | FPD   | GNL    |
| Methylobacterium_sp_88A         | PEAKAPLLV     | QR    | PAP   | FT     |
| Pelagibacterium_halotolerans    | .....         | ..... | ..... | .....  |
| Agrobacterium_tumefaciens       | .....         | ..... | ..... | .....  |
| Bosea_sp_117                    | .....         | ..... | ..... | .....  |
| Microvirga_lupini               | .....         | ..... | ..... | .....  |
| Microvirga_lotononidis          | .....         | ..... | ..... | .....  |

|                                 |                           |
|---------------------------------|---------------------------|
|                                 | 800                       |
| Rhodobacter_sphaeroides_BcsA    | HHHHHH.....               |
| Citricella_sp_SE45              | .....                     |
| Salipiger_mucosus_DSM_16094     | .....                     |
| Roseivivax_halodurans_JCM_10272 | .....                     |
| Roseivivax_atlanticus           | .....                     |
| Oceanicola_sp_S124              | .....                     |
| Tistrella_mobilis_KA081020-065  | .....                     |
| Methylobacterium_sp_88A         | EFENDRLLEGAGKQANRGSDDLVRT |
| Pelagibacterium_halotolerans    | .....                     |
| Agrobacterium_tumefaciens       | .....                     |
| Bosea_sp_117                    | .....                     |
| Microvirga_lupini               | .....                     |
| Microvirga_lotononidis          | .....                     |

## REFERENCES

- (1) Brooks, B. R.; Brooks, C. L.; Mackerell, A. D.; Nilsson, L.; Petrella, R. J.; Roux, B.; Won, Y.; Archontis, G.; Bartels, C.; Boresch, S.; Cafisch, A.; Caves, L.; Cui, Q.; Dinner, A. R.; Feig, M.; Fischer, S.; Gao, J.; Hodoseck, M.; Im, W.; Kuczera, K.; Lazaridis, T.; Ma, J.; Ovchinnikov, V.; Paci, E.; Pastor, R. W.; Post, C. B.; Pu, J. Z.; Schaefer, M.; Tidor, B.; Venable, R. M.; Woodcock, H. L.; Wu, X.; Yang, W.; York, D. M.; Karplus, M. *J. Comput. Chem.* **2009**, *30*, 1545.
- (2) Jo, S.; Kim, T.; Iyer, V. G.; Im, W. *J. Comput. Chem.* **2008**, *29*, 1859.
- (3) Jo, S.; Kim, T.; Im, W. *PLoS One* **2007**, *2*.
- (4) Jo, S.; Lim, J. B.; Klauda, J. B.; Im, W. *Biophys. J.* **2009**, *97*, 50.
- (5) Wu, E. L.; Cheng, X.; Jo, S.; Rui, H.; Song, K. C.; Davila-Contreras, E. M.; Qi, Y. F.; Lee, J. M.; Monje-Galvan, V.; Venable, R. M.; Klauda, J. B.; Im, W. *J. Comput. Chem.* **2014**, *35*, 1997.
- (6) Gorchein, A. P. *Roy. Soc. B* **1968**, *170*, 270.
- (7) Benning, C.; Huang, Z. H.; Gage, D. A. *Arch. Biochem. Biophys.* **1995**, *317*, 103.
- (8) Hsin, J.; Gumbart, J.; Trabuco, L. G.; Villa, E.; Qian, P.; Hunter, C. N.; Schulten, K. *Biophys. J.* **2009**, *97*, 321.
- (9) Best, R. B.; Zhu, X.; Shim, J.; Lopes, P. E. M.; Mittal, J.; Feig, M.; MacKerell, A. D. *J. Chem. Theory Comput.* **2012**, *8*, 3257.
- (10) MacKerell, A. D.; Bashford, D.; Bellott, M.; Dunbrack, R. L.; Evansack, J. D.; Field, M. J.; Fischer, S.; Gao, J.; Guo, H.; Ha, S.; Joseph-McCarthy, D.; Kuchnir, L.; Kuczera, K.; Lau, F. T. K.; Mattos, C.; Michnick, S.; Ngo, T.; Nguyen, D. T.; Prodhom, B.; Reiher, W. E.; Roux, B.; Schlenkrich, M.; Smith, J. C.; Stote, R.; Straub, J.; Watanabe, M.; Wiorkiewicz-Kuczera, J.; Yin, D.; Karplus, M. *J. Phys. Chem. B* **1998**, *102*, 3586.
- (11) Mackerell, A. D.; Feig, M.; Brooks, C. L. *J. Comput. Chem.* **2004**, *25*, 1400.
- (12) Hart, K.; Foloppe, N.; Baker, C. M.; Denning, E. J.; Nilsson, L.; MacKerell, A. D. *J. Chem. Theory Comput.* **2012**, *8*, 348.
- (13) Guvench, O.; Greene, S. N.; Kamath, G.; Brady, J. W.; Venable, R. M.; Pastor, R. W.; Mackerell, A. D. *J. Comput. Chem.* **2008**, *29*, 2543.
- (14) Guvench, O.; Hatcher, E.; Venable, R. M.; Pastor, R. W.; MacKerell, A. D. *J. Chem. Theory Comput.* **2009**, *5*, 2353.
- (15) Guvench, O.; Mallajosyula, S. S.; Raman, E. P.; Hatcher, E.; Vanommeslaeghe, K.; Foster, T. J.; Jamison, F. W.; MacKerell, A. D. *J. Chem. Theory Comput.* **2011**, *7*, 3162.
- (16) Durell, S. R.; Brooks, B. R.; Bennaïm, A. *J Phys Chem-Us* **1994**, *98*, 2198.
- (17) Jorgensen, W. L.; Chandrasekhar, J.; Madura, J. D.; Impey, R. W.; Klein, M. L. *J. Chem. Phys.* **1983**, *79*, 926.
- (18) Phillips, J. C.; Braun, R.; Wang, W.; Gumbart, J.; Tajkhorshid, E.; Villa, E.; Chipot, C.; Skeel, R. D.; Kale, L.; Schulten, K. *J. Comput. Chem.* **2005**, *26*, 1781.
- (19) Miyamoto, S.; Kollman, P. A. *J. Comput. Chem.* **1992**, *13*, 952.
- (20) Ryckaert, J. P.; Ciccotti, G.; Berendsen, H. J. C. *J Comput Phys* **1977**, *23*, 327.
- (21) Darden, T.; York, D.; Pedersen, L. *J. Chem. Phys.* **1993**, *98*, 10089.
- (22) Nam, K.; Gao, J. L.; York, D. M. *J. Chem. Theory Comput.* **2005**, *1*, 2.
- (23) Walker, R. C.; Crowley, M. F.; Case, D. A. *J. Comput. Chem.* **2008**, *29*, 1019.
- (24) Crowley, M. F.; Williamson, M. J.; Walker, R. C. *Int. J. Quantum Chem.* **2009**, *109*, 3767.
- (25) Case, D. A.; T.A. Darden; T.E. Cheatham, I.; C.L. Simmerling; J. Wang; R.E. Duke; R. Luo; R.C. Walker; W. Zhang; K.M. Merz; B. Roberts; S. Hayik; A. Roitberg; G. Seabra; J. Swails; A.W. Goetz; I. Kolossváry; K.F. Wong; F. Paesani; J. Vanicek; R.M. Wolf; J. Liu; X. Wu; S.R. Brozell; T. Steinbrecher; H. Gohlke; Q. Cai; X. Ye; J. Wang; M.-J. Hsieh; G. Cui; D.R. Roe; D.H. Mathews; M.G. Seetin; R. Salomon-Ferrer; C. Sagui; V. Babin; T. Luchko; S. Gusarov; A. Kovalenko; Kollman, P. A. University of California, San Francisco, 2012.
- (26) Morgan, J. L. W.; McNamara, J. T.; Zimmer, J. *Nat. Struct. Mol. Biol.* **2014**, *21*, 489.
- (27) Morgan, J. L. W.; Strumillo, J.; Zimmer, J. *Nature* **2013**, *493*, 181.
- (28) Kumar, S.; Bouzida, D.; Swendsen, R. H.; Kollman, P. A.; Rosenberg, J. M. *J. Comput. Chem.* **1992**, *13*, 1011.
- (29) Grossfield, A.; 2.0.6 ed.; Grossfield, A., Ed. 2012.
- (30) French, A. D.; Johnson, G. P. *Cellulose* **2004**, *11*, 449.
- (31) French, A. D.; Johnson, G. P.; Cramer, C. J.; Csonka, G. I. *Carbohydr. Res.* **2012**, *350*, 68.
- (32) French, A. D.; Johnson, G. P.; Kelterer, A.-M.; Dowd, M. K.; Cramer, C. J. *International Journal of Quantum Chemistry* **2001**, *84*, 416.
- (33) Johnson, G. P.; Petersen, L.; French, A. D.; Reilly, P. J. *Carbohydr. Res.* **2009**, *344*, 2157.
- (34) Gouet, P.; Robert, X.; Courcelle, E. *Nucleic Acids Res.* **2003**, *31*, 3320.
